# Supplementary material for: Antibody and Cell-Mediated Immune Responses Are Correlates of Protection against Influenza Infection in Vaccinated Older Adults
Source: Vaccines (Basel). 2021 Jan 7;9(1):25. doi: 10.3390/vaccines9010025 (PMC7825602; doi:10.3390/vaccines9010025)
Supplement: Supplementary file 1 [file vaccines-09-00025-s001.pdf]

**Supplemental Table S1:** Summary of antibody and cell-mediated immune response measures for participants at each time point, subdivided according to LCII status.

|                          |          | LCII at 10-20 weeks     |                       |                       |
|--------------------------|----------|-------------------------|-----------------------|-----------------------|
|                          |          | Negative<br>(N=582)     | A/H3N2<br>(N=17)      | B<br>(N=9)            |
| A/H3N2 HAI               | Baseline | 47.9 (44, 52.4) [4]     | 41.7 (28.9, 60.1) [0] | 48.5 (26.2, 86.4) [0] |
|                          | 4        | 156 (141, 173) [6]      | 75.3 (51.1, 120) [0]  | 154 (63.5, 388) [0]   |
|                          | 10       | 116 (106, 128) [19]     | 60.1 (40, 90.4) [0]   | 109 (40, 296) [0]     |
|                          | 20       | 96.2 (87.3, 106) [22]   | 231 (139, 369) [0]    | 109 (46.7, 296) [0]   |
| B HAI                    | Baseline | 37.8 (35.3, 40.3) [4]   | 46.1 (32, 70.8) [0]   | 33 (23.3, 46.7) [0]   |
|                          | 4        | 78 (72.1, 83.6) [6]     | 72.2 (51.1, 116) [0]  | 61.1 (44.9, 86.4) [0] |
|                          | 10       | 59.7 (55.5, 63.9) [19]  | 56.6 (38.4, 86.8) [0] | 44.9 (30.5, 63.5) [0] |
|                          | 20       | 54.3 (50.4, 58.1) [22]  | 50.1 (34.7, 78.4) [0] | 89.8 (56.5, 148) [0]  |
| IFN $\gamma$<br>(A/H3N2) | Baseline | 1120 (1030, 1220) [6]   | 1440 (848, 2460) [0]  | 2610 (1770, 3730) [0] |
|                          | 4        | 1240 (1140, 1340) [8]   | 1390 (762, 2400) [0]  | 2800 (1830, 4120) [0] |
|                          | 10       | 1140 (1030, 1260) [16]  | 1080 (623, 2040) [0]  | 3000 (1770, 4860) [0] |
|                          | 20       | 1110 (1020, 1210) [29]  | 3510 (2010, 5940) [1] | 2770 (1390, 5050) [0] |
| IL-10<br>(A/H3N2)        | Baseline | 11.7 (11.1, 12.4) [5]   | 15.2 (10.7, 21.6) [0] | 16.8 (14.2, 19.8) [0] |
|                          | 4        | 21.4 (20.2, 22.9) [8]   | 23.2 (16.3, 33.8) [0] | 28.8 (23, 35.6) [0]   |
|                          | 10       | 16 (14.9, 17.3) [19]    | 72.3 (36.5, 139) [0]  | 19.1 (15.1, 23.6) [0] |
|                          | 20       | 13.1 (12.3, 14) [28]    | 73.9 (53.9, 103) [1]  | 15.9 (10.7, 21.7) [0] |
| IFN $\gamma$ (B)         | Baseline | 803 (670, 966) [503]    | 1120 (747, 1760) [0]  | 694 (455, 1040) [0]   |
|                          | 4        | 1010 (831, 1220) [503]  | 1270 (917, 1680) [0]  | 789 (473, 1330) [0]   |
|                          | 10       | 859 (706, 1040) [504]   | 903 (554, 1400) [1]   | 865 (514, 1430) [0]   |
|                          | 20       | 894 (737, 1100) [507]   | 1190 (857, 1710) [1]  | 1730 (722, 3690) [0]  |
| IL-10 (B)                | Baseline | 18.2 (15.5, 21.3) [503] | 28.3 (21.2, 40.1) [0] | 15.1 (13.1, 17.6) [0] |
|                          | 4        | 32.7 (27.7, 38.7) [503] | 45.7 (33, 65) [0]     | 31.1 (19, 49.6) [0]   |
|                          | 10       | 22.8 (19.1, 27.1) [504] | 46.4 (28.8, 72.3) [1] | 27 (14.4, 60.2) [0]   |
|                          | 20       | 23.5 (19.5, 28.5) [507] | 31.3 (23.3, 43.4) [1] | 84.5 (33, 203) [0]    |

Hemagglutination inhibition (HAI) was measured for the seasonal A/H3N2 and B types at baseline (pre-vaccination) and 4-, 10- and 20-weeks post-vaccination. Cell-mediated immune measures IFN $\gamma$  and IL-10 were measured at the same time points, in response to *ex vivo* challenge with either A/H3N2 or B types (in brackets). All measures are presented as the geometric mean (95% confidence interval), and the count of missing data in square brackets. \* IFN $\gamma$  and IL-10 responses to influenza B were measured in a subset of 110 participants. LCII, laboratory-confirmed influenza illness.
